# Supplementary material
Source: publisher figshare collection journal article supplement (https://acs.figshare.com/ndownloader/files/3923032)
Supplement: Supplementary file 1 [file 3923032]

# Copper(II) Acetate/Bis(4-pyridylthio)methane System: Synthesis, Structural Diversity and Single-Crystal to Single-Crystal Transformation.

Ana Belén Lago, Rosa Carballo, Sabina Rodríguez-Hermida, Ezequiel M. Vázquez-López.

<sup>a</sup> Departamento de Química Inorgánica, Facultade de Química, Universidade de Vigo, E-36310 Vigo, Galicia, Spain.

\*Corresponding authors: A. B. Lago, e-mail: [ablago@uvigo.es](mailto:ablago@uvigo.es) and R. Carballo, e-mail: [rcrial@uvigo.es](mailto:rcrial@uvigo.es)

## Supplementary material

| Contents:                                                                                                                                                   | Pag. |
|-------------------------------------------------------------------------------------------------------------------------------------------------------------|------|
| <i>Experimental conditions</i>                                                                                                                              | 2    |
| Table S1. Synthetic conditions of compounds <b>1-4</b>                                                                                                      |      |
| Table S2. Diffusion conditions of <b>1</b> , <b>3</b> and <b>4</b>                                                                                          |      |
| <i>Spectroscopic data</i>                                                                                                                                   | 3-4  |
| Table S3. Symmetric and Antisymmetric Stretches in the acetate ions for compounds <b>1-4</b>                                                                |      |
| Table S4. Significant IR bands for the ligand and compounds <b>1-4</b>                                                                                      |      |
| Figure S1. IR spectra of complexes <b>1</b> (A), <b>2</b> (B), <b>3</b> (C) and <b>4</b> (D)                                                                |      |
| <i>Thermogravimetric analysis</i>                                                                                                                           | 5-6  |
| Figure S2A. TGA of <b>1</b>                                                                                                                                 |      |
| Figure S2B. TGA of <b>2</b>                                                                                                                                 |      |
| Figure S2C. TGA of <b>3</b>                                                                                                                                 |      |
| Figure S2D. TGA of <b>4</b>                                                                                                                                 |      |
| <i>Study of structural transformation in 2</i>                                                                                                              | 7-8  |
| Figure S3. Picture of single crystals of <b>1</b> and <b>2</b>                                                                                              |      |
| Figure S4. IR spectra of <b>1</b> , <b>2</b> and <b>2-desolvated</b>                                                                                        |      |
| Figure S5. Experimental powder X-ray diffractograms for <b>2</b> before and after the treatment to remove the crystallization solvents                      |      |
| Figure S6. Experimental powder X-ray diffractograms for <b>2</b> and <b>2.desolvated</b> and simulated PXRD from crystal structures <b>1</b> and <b>2</b> . |      |
| Table S5. Single crystal data before and after the phase transition in different examples                                                                   |      |
| <i>Study of structural transformation in 3</i>                                                                                                              | 10   |
| Figure S7. Experimental powder X-ray diffractograms for <b>3</b> and <b>3.T</b> and simulated PXRD from crystal structures <b>3</b> and <b>1</b> .          |      |

**Table S1.** Synthetic conditions of compounds **1-4**:

| Compound                                                                                                            | Synthesis. | Molar ratio<br>M:L | Solvent                             | Yield.<br>(%) |
|---------------------------------------------------------------------------------------------------------------------|------------|--------------------|-------------------------------------|---------------|
| <b>1</b> [Cu <sub>2</sub> (AcO) <sub>4</sub> (SCS)]                                                                 | R(3h)      | 1:1                | MeOH                                | 75            |
|                                                                                                                     | Diff       | 2:1                | H <sub>2</sub> O/EtOH               |               |
| <b>2</b> [Cu <sub>2</sub> (AcO) <sub>4</sub> (SCS)].solv                                                            | mw         | 1:1                | DMF/EtOH<br>2:1                     | 30            |
| <b>3</b> [Cu <sub>4</sub> (AcO) <sub>8</sub> (SCS) <sub>5</sub> (H <sub>2</sub> O) <sub>4</sub> ].4H <sub>2</sub> O | Hydrot.    | 1:1                | H <sub>2</sub> O                    | 23            |
|                                                                                                                     | Diff.      | 2:1                | H <sub>2</sub> O/EtOH               |               |
| <b>4</b> [Cu <sub>4</sub> (OH) <sub>2</sub> (AcO) <sub>6</sub> (SCS) <sub>2</sub> ].10H <sub>2</sub> O              | Diff.      | 2:1                | H <sub>2</sub> O/CH <sub>3</sub> CN | 10            |

**Table S2.** Diffusion conditions of **1, 3** and **4**:

| Compound | Salt                                   | Solvent          | Molar ratio | Solvent<br>(ligand) | Scheme                                                                                                                                    |
|----------|----------------------------------------|------------------|-------------|---------------------|-------------------------------------------------------------------------------------------------------------------------------------------|
| <b>1</b> | Cu(AcO) <sub>2</sub> .H <sub>2</sub> O | H <sub>2</sub> O | 2:1         | EtOH                | Green: <b>1</b> (top)<br>Blue: <b>3</b> (bottom)<br>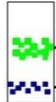 |
| <b>3</b> | Cu(AcO) <sub>2</sub> .H <sub>2</sub> O | H <sub>2</sub> O | 2:1         | EtOH                |                                                                                                                                           |
| <b>4</b> | Cu(AcO) <sub>2</sub> .H <sub>2</sub> O | H <sub>2</sub> O | 2:1         | CH <sub>3</sub> CN  |                                                                                                                                           |

**Table S3.** Symmetric and Antisymmetric Stretches in the Acetate Ion for compounds **1-4**:

| Compound        | Coordination mode                   | $\nu_{\text{asym}}(\text{OCO})$ | $\nu_{\text{sym}}(\text{OCO})$ | $\Delta a\text{-s exp (cm}^{-1}\text{)}$ |
|-----------------|-------------------------------------|---------------------------------|--------------------------------|------------------------------------------|
| <b>1</b>        | bridging                            | 1616s                           | 1422s                          | 194                                      |
| <b>2 dmf</b>    | bridging                            | 1680m <sup>b</sup> ,<br>1625s   | 1430s                          | 195                                      |
| <b>2.desol.</b> | bridging                            | 1618s                           | 1422s                          | 196                                      |
| <b>3</b>        | unidentate                          | 1596s                           | 1390m                          | 206                                      |
| <b>4</b>        | unidentate<br>bidentate<br>bridging | 1585s                           | 1403s<br>1410sh                | 182<br>175                               |

**Table S4.** Significant IR bands for the ligand and compounds **1-4** in the range 2000-400  $\text{cm}^{-1}$ 

| Comp .          | $\nu(\text{OH})$ | $\nu(\text{CC}) + \nu(\text{CN})$ | $\omega(\text{CH}, \text{CH}_2)$ | $\nu(\text{CH}) + \delta(\text{C-H})$ | $\gamma(\text{C-H})$ | $\nu(\text{CS})$ | $\delta(\text{C-H})$ |
|-----------------|------------------|-----------------------------------|----------------------------------|---------------------------------------|----------------------|------------------|----------------------|
| <b>1</b>        | -                | 1588m, 1486m                      | 1211m                            | 1072m                                 | 804m                 | 736m             | 498m                 |
| <b>2</b>        | 3437m            | 1586m, 1486m                      | 1225m                            | 1065m                                 | 821m                 | 712m             | 502m                 |
| <b>2.desol.</b> | 3437m            | 1588m, 1485m                      | 1230m                            | 1070m                                 | 805m                 | 707m             | 498m                 |
| <b>3</b>        | 3421br           | 1596s, 1486m                      | 1226m                            | 1066m                                 | 807m                 | 733m             | 501m                 |
| <b>4</b>        | 3429m            | 1585s, 1482m                      | 1216m                            | 1067m                                 | 805m                 | 730m             | 506m                 |

**Figure S1.** IR spectra of the compounds **1-4** in the range 2000-400  $\text{cm}^{-1}$

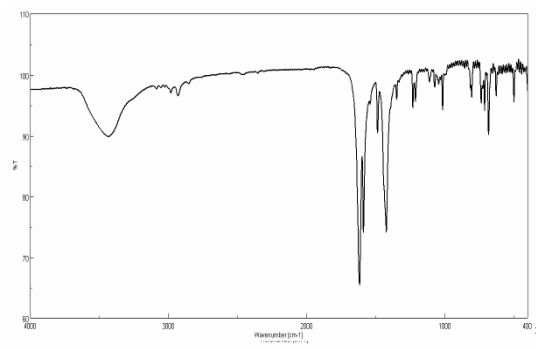

A) Spectra of **1**

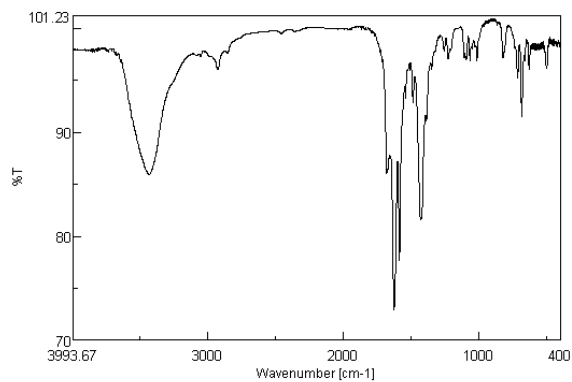

B) Spectra of **2**

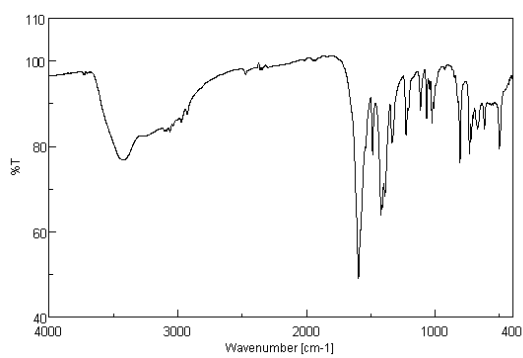

C) Spectra of **3**

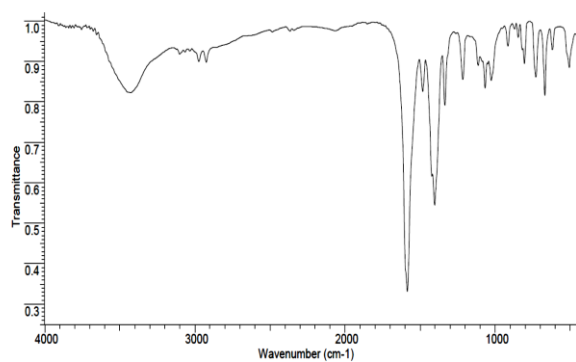

D) Spectra of **4**

**Figure S2.** Thermogravimetric analysis (TGA) of **1-4** carried out between 25 and 600°C

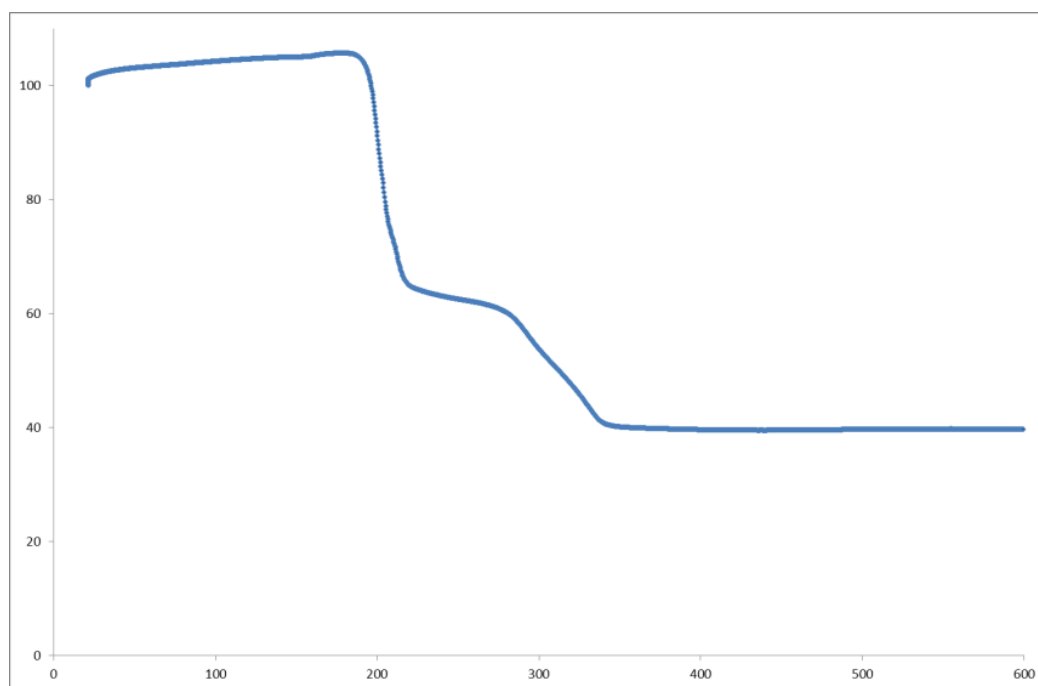

A) Compound **1**

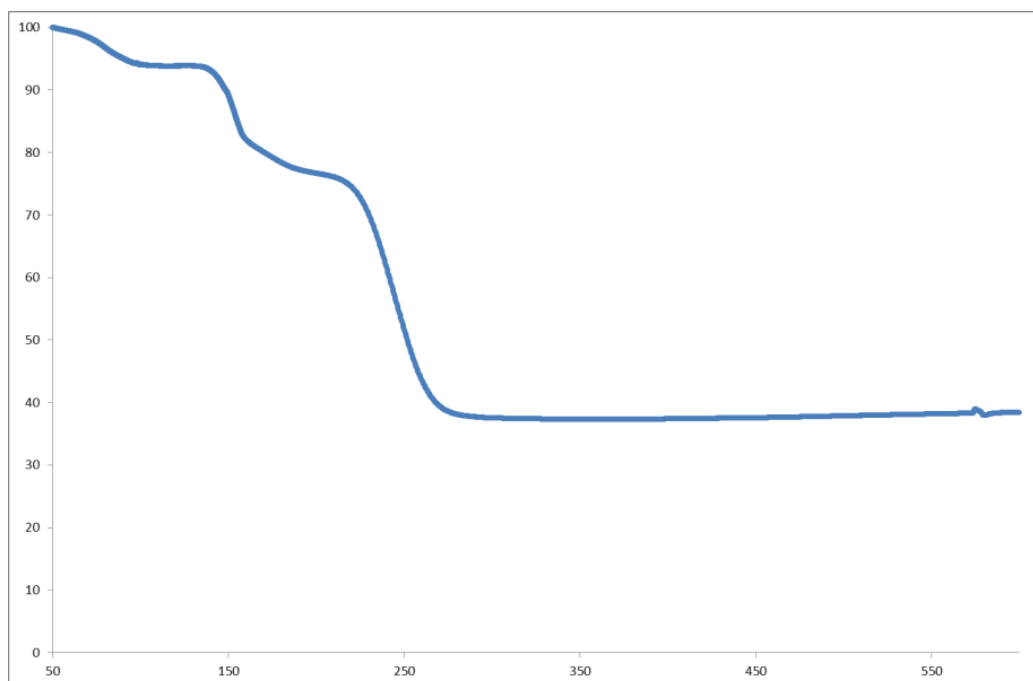

B) Compound **2**

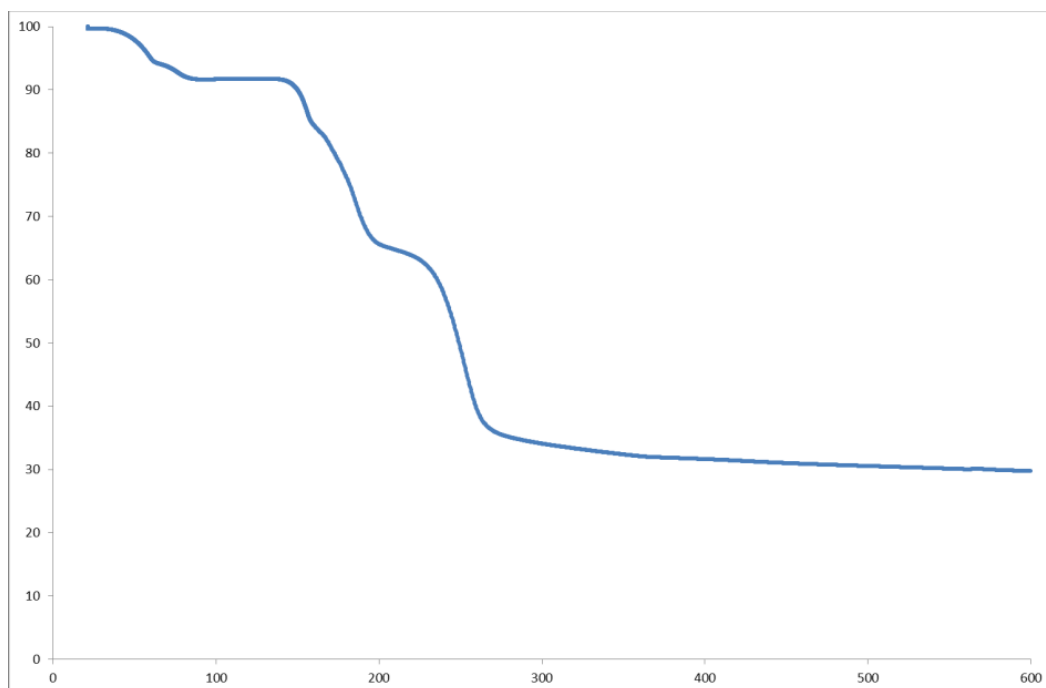

C) Compound **3**

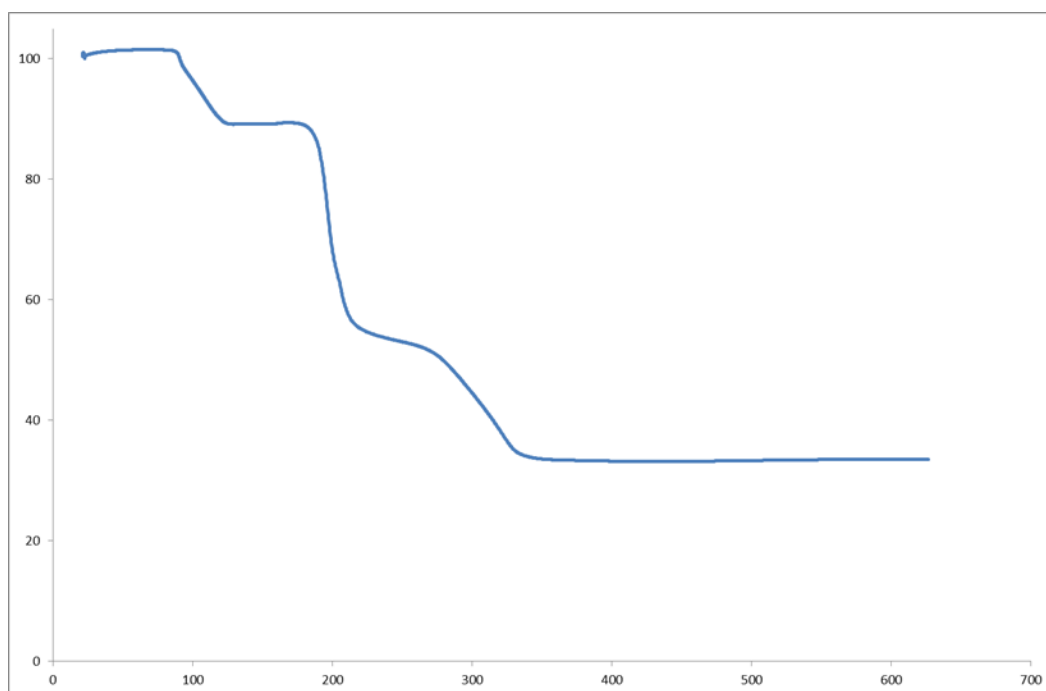

D) Compound **4**

## Study of structural transformation in 2

**Figure S3.** At first glance, it is possible to distinguish both compounds by the shape of the crystals, green rectangular prism in **1** and green thin sheets in **2**:

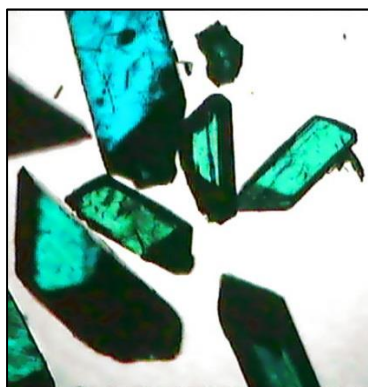

A) compound 1

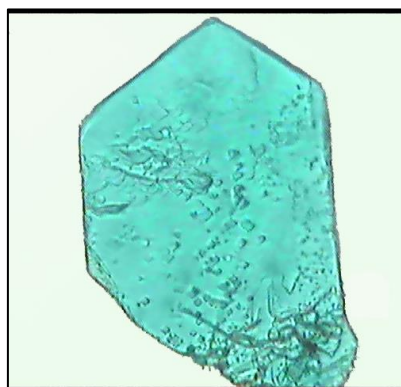

B) Compound 2

A suspension of **2** was soaked in dichloromethane for 2 hours, over the course of which the solvent was replaced and then heating at 80°C for 24 hours. The resulting solid was characterized as anhydrous compound by X-ray powder diffraction (XRPD) and IR. The IR spectra do not show the characteristic bands of dmf molecules. Structural transformation was confirmed by Powder X-ray diffraction.

**Figure S4.** IR spectra of **1**, **2** and **2.desolvated** in the range 2000-400  $\text{cm}^{-1}$

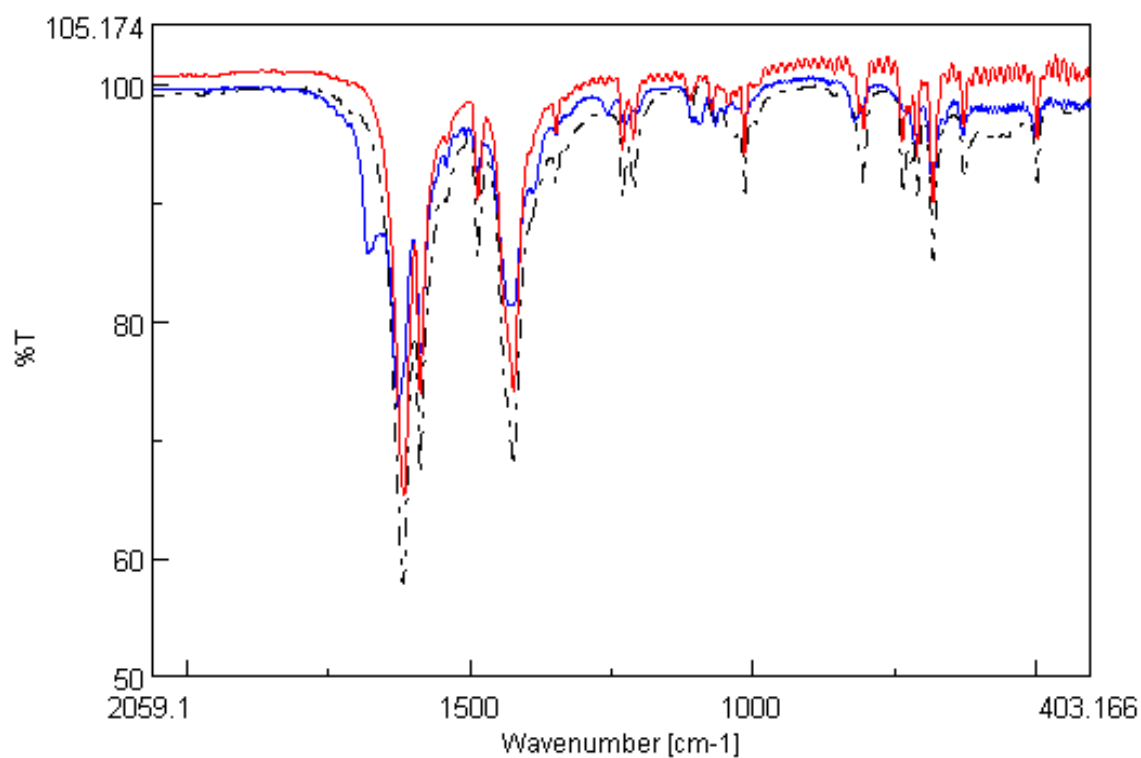

Red: compound **1**; blue: compound **2**, black dash line: **2.desolvated**.

**Figure S5.** Experimental powder X-ray diffractograms for **2** before and after the treatment to remove the crystallization solvents.

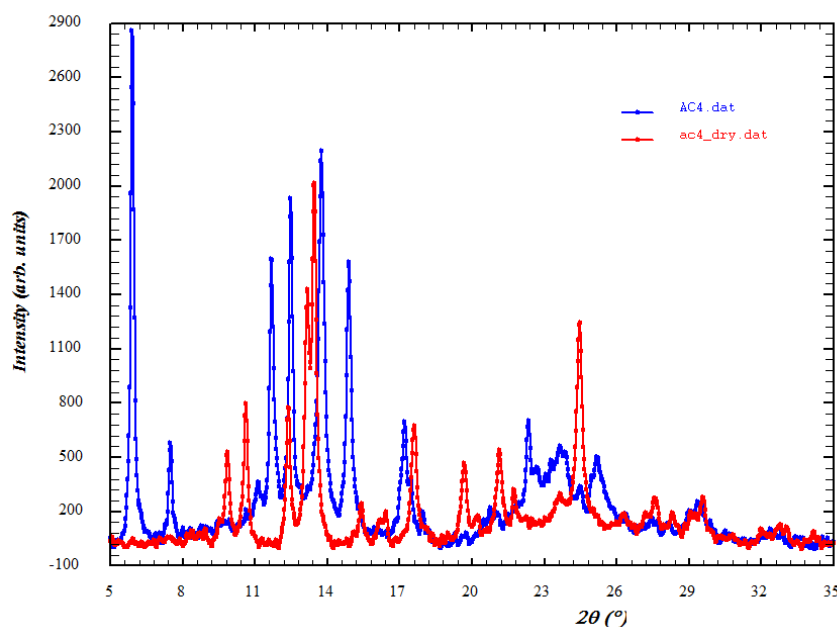

Powder X-ray diffractograms of as-synthesized compound **2** (blue) and **2.desolvated** (red).

**Figure S6.** Experimental powder X-ray diffractograms for **2** and **2.desolvated** and simulated PXRD from crystal structures **1** and **2**.

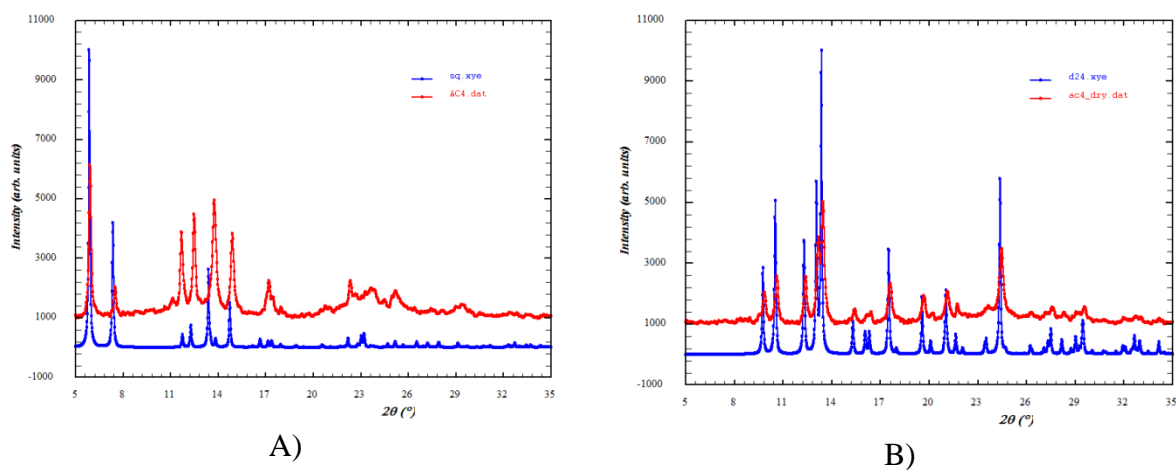

**A)** Calculated from single crystal data of **2** (blue) and as-synthesized **2**(red). **B)** Calculated from single crystal data of **1** (blue) and **2.desolvated** after the treatment to remove the crystallization solvents (red).



**Table S5.** Single crystal data before and after the phase transition in different examples:

|                          |                                                                                                   |                                                                                |
|--------------------------|---------------------------------------------------------------------------------------------------|--------------------------------------------------------------------------------|
| Reference                | Seki, T.; Sakurada, K.; Ito., H. <i>Angew. Chem. Int. Ed.</i> <b>2013</b> , 52, 12828             |                                                                                |
| Stimulus                 | Mechanical picking or solid seeding                                                               |                                                                                |
| Crystal                  | INITIAL                                                                                           | TRANSFORMED                                                                    |
| Empirical Formula        | C <sub>15</sub> H <sub>14</sub> AuN                                                               | C <sub>15</sub> H <sub>14</sub> AuN                                            |
| Formula Weight           | 405.25                                                                                            | 405.25                                                                         |
| Crystal System           | monoclinic                                                                                        | orthorhombic                                                                   |
| Space group              | <i>P21/n</i>                                                                                      | <i>Ima2</i>                                                                    |
| <i>a</i> /Å              | 12.813(2)                                                                                         | 7.172(2)                                                                       |
| <i>b</i> /Å              | 32.566(6)                                                                                         | 20.048(6)                                                                      |
| <i>c</i> /Å              | 19.876(4)                                                                                         | 8.940(3)                                                                       |
| $\alpha$ /°              | 90.0000                                                                                           | 90.0000                                                                        |
| $\beta$ /°               | 97.110(4)                                                                                         | 90.0000                                                                        |
| $\gamma$ /°              | 90.0000                                                                                           | 90.0000                                                                        |
| <i>V</i> /Å <sup>3</sup> | 8330(3)                                                                                           | 1285.3(7)                                                                      |
|                          |                                                                                                   |                                                                                |
| Reference                | Girad, J.; Fromm, K. <i>CrystEngComm</i> , <b>2012</b> , 14, 6487                                 |                                                                                |
| Stimulus                 | Change temperature from 273K to 200K                                                              |                                                                                |
| Crystal                  | INITIAL                                                                                           | TRANSFORMED                                                                    |
| Empirical Formula        | C <sub>8</sub> H <sub>16</sub> Ag <sub>2</sub> N <sub>2</sub> O <sub>10</sub>                     | C <sub>32</sub> H <sub>64</sub> Ag <sub>8</sub> N <sub>8</sub> O <sub>40</sub> |
| Formula Weight           | 515.97                                                                                            | 2063.87                                                                        |
| Crystal System           | orthorhombic                                                                                      | monoclinic                                                                     |
| Space group              | <i>lbca</i>                                                                                       | <i>P21/c</i>                                                                   |
| <i>a</i> /Å              | 13.4204(6)                                                                                        | 16.3286(8)                                                                     |
| <i>b</i> /Å              | 16.5076(7)                                                                                        | 13.4452(5)                                                                     |
| <i>c</i> /Å              | 28.1263(13)                                                                                       | 28.0645(14)                                                                    |
| $\alpha$ /°              | 90.0000                                                                                           | 90.0000                                                                        |
| $\beta$ /°               | 90.0000                                                                                           | 90.0000                                                                        |
| $\gamma$ /°              | 90.0000                                                                                           | 90.0000                                                                        |
| <i>V</i> /Å <sup>3</sup> | 6231.1(5)                                                                                         | 6160.7(5)                                                                      |
|                          |                                                                                                   |                                                                                |
| Reference                | Skoko, Z.; Zamir, S.; Naumov. P.; Bernstein. J. <i>J. Am. Chem. Soc.</i> <b>2010</b> , 132, 14191 |                                                                                |
| Stimulus                 | Heating                                                                                           | UV irradiation                                                                 |
| Crystal                  | INITIAL                                                                                           | TRANSFORMED                                                                    |
| Crystal System           | orthorhombic                                                                                      | orthorhombic                                                                   |
| Space group              | <i>P2<sub>1</sub>2<sub>1</sub>2<sub>1</sub></i>                                                   | <i>P2<sub>1</sub>2<sub>1</sub>2<sub>1</sub></i>                                |
| <i>a</i> /Å              | 7.3927(2)                                                                                         | 7.453(3)                                                                       |
| <i>b</i> /Å              | 10.1512(4)                                                                                        | 11.220(4)                                                                      |
| <i>c</i> /Å              | 24.6291(9)                                                                                        | 22.790(7)                                                                      |
| <i>V</i> /Å <sup>3</sup> | 1848.29(11)                                                                                       | 1905.8(11)                                                                     |
|                          |                                                                                                   |                                                                                |
| Reference                | Liu, G.; Liu, J.; Liu, Y.; Tao, X. <i>J. Am. Chem. Soc.</i> <b>2014</b> , 136, 590                |                                                                                |
| Stimulus                 | Mechanical                                                                                        |                                                                                |
| Crystal                  | INITIAL                                                                                           | TRANSFORMED                                                                    |
| Crystal System           | triclinic                                                                                         | triclinic                                                                      |
| Space group              | <i>P-1</i>                                                                                        | <i>P-1</i>                                                                     |
| <i>a</i> /Å              | 8.0350(5)                                                                                         | 7.127(5)                                                                       |
| <i>b</i> /Å              | 8.2606(6)                                                                                         | 7.543(5)                                                                       |
| <i>c</i> /Å              | 9.7665(7)                                                                                         | 12.014(5)                                                                      |
| $\alpha$ /°              | 77.260(1)                                                                                         | 83.495(5)                                                                      |
| $\beta$ /°               | 73.554(1)                                                                                         | 88.783(5)                                                                      |
| $\gamma$ /°              | 78.132(1)                                                                                         | 67.724(5)                                                                      |
| <i>V</i> /Å <sup>3</sup> | 599.26(7)                                                                                         | 593.6(6)                                                                       |

## Study of structural transformation in **3**

Blue single crystals of **3** were stirred in ethanol for one day and were slightly heated until the total solution. The green solution formed was concentrate and the resulting green powder was washed with acetone and vacuum dried. In order to study the structural stability X-ray powder diffraction (XRPD) was collected before (**3**) and after (**3.T**) the treatment.

**Figure S7.** Experimental powder X-ray diffractograms for **3** and **3.T** and simulated PXRD from crystal structures **3** and **1**.

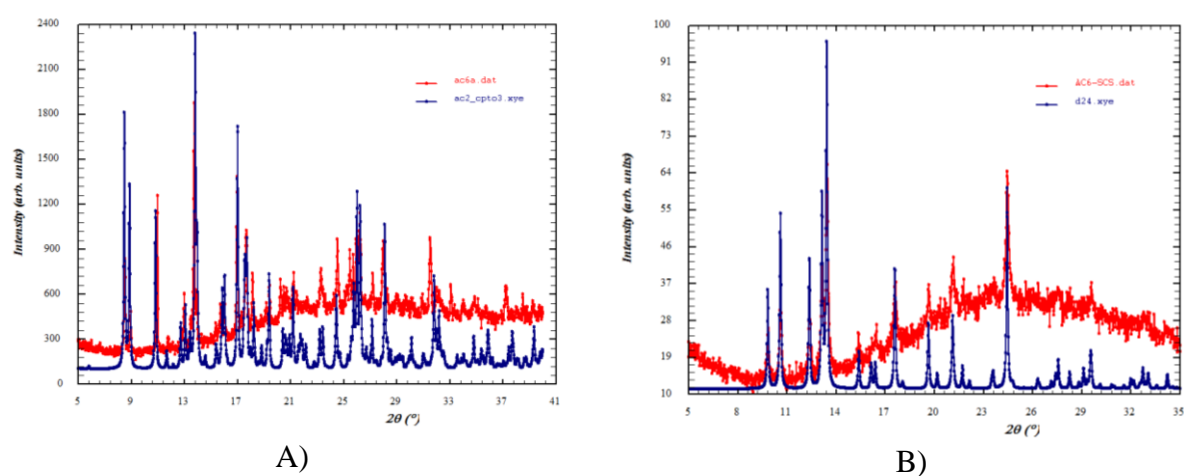

**A)** Calculated from single crystal data of **3** (blue) and as-synthesized **3**(red). **B)** Calculated from single crystal data of **1** (blue) and **3.T** after the treatment to change the structure (red).
